# Supplementary material for: 身代わり求核置換反応(VNS)を利用した芳香族ニトロ化合物の直接アミノ化反応
Source: Royal Society of Chemistry journal article supplement (doi:10.1039/d0dt03144e), 2003-03-01
Supplement: d0dt03144e1.pdf [file d0dt03144e1.pdf]

## Supporting Information for

# Photoluminescent properties and molecular structures of dinuclear gold(I) complexes with bridged diphosphine ligands: near-unity phosphorescence from $^3\text{XMMCT}/^3\text{MC}$

Masahisa Osawa,<sup>\*a</sup> Sakie Soma,<sup>a</sup> Mikio Hoshino,<sup>a</sup> Yuya Tanaka,<sup>b</sup> and Munetaka Akita<sup>b</sup>

<sup>a</sup> Department of Applied Chemistry, Nippon Institute of Technology, Gakuendai 4-1, Miyashiro-Machi, Saitama, 345-8501, Japan

<sup>b</sup> Laboratory for Chemistry and Life Science Institute of Innovative Research, Tokyo Institute of Technology R1-27, 4259 Nagatsuta, Midori-ku, Yokohama 226-8503, Japan

### Contents

| Experimental Detail                                                                                             | page  |
|-----------------------------------------------------------------------------------------------------------------|-------|
| 1. General Information                                                                                          | S3–S4 |
| 2. Crystal Structure determination                                                                              | S5–S8 |
| <b>Table S1</b> Crystallographic data for <b>1DOR</b> and <b>2DOR</b>                                           |       |
| <b>Table S2</b> Crystallographic data for <b>3DOR</b> and <b>3DGR</b>                                           |       |
| <b>Fig. S1</b> Perspective views of <b>1DOR</b> , <b>2DOR</b> , <b>3DOR</b> and <b>3DGR</b>                     |       |
| <b>Fig. S2</b> Core structures of <b>1DOR</b> , <b>2DOR</b> , <b>3DOR</b> and <b>3DGR</b>                       |       |
| 3. NMR Experiments                                                                                              | S5–S7 |
| <b>Fig. S3</b> $^1\text{H}$ NMR spectrum of <b>1D</b> in $\text{CD}_2\text{Cl}_2$ at 293 K.                     |       |
| <b>Fig. S4</b> $^{31}\text{P}$ $\{^1\text{H}\}$ NMR spectrum of <b>1D</b> in $\text{CD}_2\text{Cl}_2$ at 293 K. |       |
| <b>Fig. S5</b> $^1\text{H}$ NMR spectrum of <b>2D</b> in $\text{CD}_2\text{Cl}_2$ at 293 K.                     |       |
| <b>Fig. S6</b> $^{31}\text{P}$ $\{^1\text{H}\}$ NMR spectrum of <b>2D</b> in $\text{CD}_2\text{Cl}_2$ at 293 K. |       |
| <b>Fig. S7</b> $^1\text{H}$ NMR spectrum of <b>3D</b> in $\text{CD}_2\text{Cl}_2$ at 293 K.                     |       |
| <b>Fig. S8</b> $^{31}\text{P}$ $\{^1\text{H}\}$ NMR spectrum of <b>3D</b> in $\text{CD}_2\text{Cl}_2$ at 293 K. |       |
| 4. Thermogravimetric Analyses                                                                                   | S12   |
| <b>Fig. S9</b> TGA data for <b>1DOR</b> , <b>2DOR</b> , <b>3DOR</b> , and <b>3DGR</b> under argon atmosphere    |       |
| 5. Photophysical data                                                                                           | S12   |

**Table S3** Photophysical properties of **1** and **3** in crystals.

**Table S4** Rate constants and TADF-to-phosphorescence ratios for **1** and **3**.

6. Theoretical Studies S13–S26

**Fig. S10** DFT-optimized structures of **3DOR** (left) and **3DGR** (right) in  $T_1$  states without crystallization solvents.

**Table S5** Selected bond distances (Å) and angles (°) for **3DOR** and **3DGR** at  $T_1$  optimized structures

**Table S6** Composition of hole and electron for **3DOR** at the  $T_1$  optimized structure.

**Table S7** NTO analysis for selected transitions of **3DGR** at the  $T_1$  optimized structures.

**Table S8** Composition of hole and electron for **3DGR** at the  $T_1$  optimized structure

**Fig. S11** DFT-optimized structures of **3DOR** (left) and **3DGR** (right) in  $T_1$  states with crystallization solvents. Crystalline THF and acetone have been omitted for clarity

**Table S9** Selected bond distances (Å) and angles (°) for **3DOR** and **3DGR** at  $T_1$  optimized structures including crystalline solvent molecules.

**Table S10** NTO analysis for selected transitions of **3DOR** at the  $T_1$  optimized structure with crystalline THF molecules.

**Table S11** Composition of hole and electron for **3DOR** at the  $T_1$  optimized structure with crystalline THF molecules.

**Table S12** NTO analysis for selected transitions of **3DGR** at the  $T_1$  optimized structure with crystalline acetone molecules.

**Table S13** Composition of hole and electron for **3DGR** at the  $T_1$  optimized structure with crystalline acetone molecules.

**Table S14** Major single group excitation contributions for sublevels (M1, M2, and M3) in  $T_1$  states for **3DOR**.

**Table S15** Major single group excitation contributions for sublevels (M1, M2, and M3) in  $T_1$  states for **3DGR**.

**Fig. S12** Major transitions of  $S_2$  states at  $T_1$ -optimized structures of (A) **3DOR** and (B) **3DGR**

**Table S16** Geometry data of **3DOR** without crystalline solvents for the optimized  $T_1$  state

**Table S17** Geometry data of **3DGR** without crystalline solvents for the optimized  $T_1$  state

**Table S18** Geometry data of **3DOR** with crystalline THF molecules for the optimized  $T_1$  state

**Table S19** Geometry data of **3DGR** with crystalline acetone molecules for the optimized  $T_1$  state

References

## 1. General Information

$^1\text{H}$  and  $^{31}\text{P}$  NMR spectra were recorded on a Bruker AVANCE-400 spectrometer.  $^1\text{H}$  chemical shifts were referenced to residual solvent peaks.  $^{31}\text{P}$  chemical shifts were referenced to an external standard, 85% phosphoric acid ( $\delta = 0$  ppm). Elemental analyses (C and H) were carried out using an elemental analyser (Vario EL CHNOS) from Elementar. For the photo-physical studies, dissolved oxygen was removed by repeated freeze-pump-thaw cycles. Steady-state emission spectra were recorded at room temperature and at 77 K using a Hitachi F-7000 spectrofluorometer. The intensity distribution of the Xenon lamp incorporated in the spectrofluorometer was corrected using Rhodamine B in ethylene glycol. The output of the photomultiplier tube was calibrated between 300 and 850 nm with a secondary standard lamp.

Laser photolysis studies were performed using a Nd:YAG laser (Sure Light 400, Hoya Continuum Ltd.) equipped with second, third, and fourth harmonic generators. The laser pulses used for the emission lifetime measurements were of the third harmonic (355 nm). The duration and energy of the laser pulse were 10 ns and 30 mJ/pulse, respectively. The system used to monitor the emission decay was reported elsewhere.<sup>S1</sup>

An Optistat DN-V2 cryostat from Oxford Instruments was used to measure the emission spectra and lifetimes in the temperature range from 293 to 83 K. After the measurement of emission spectra and lifetimes at 83 K, that at 293 K was performed again to confirm that crystallization solvents have not been removed from the crystals. Crystalline powders of samples used for emission measurements were sealed in quartz tubes with a diameter of 3 mm. Optical measurements at 77 K were carried out at the temperature of liquid nitrogen using a Dewar vessel with four optical windows. After filling the vessel with liquid nitrogen, the sample, which was placed in a quartz tube with a diameter of 5 mm, was immersed into the liquid nitrogen for rapid cooling, and luminescence spectra and lifetimes were measured.

Emission quantum yields were determined at room temperature and at 77 K using an absolute PL quantum yield measurement system (C-9920-02G, Hamamatsu).<sup>S2</sup>

A suitable crystal for **1DOR**, **2DOR**, **3DOR**, and **3DGR** was selected and mounted using Paratone-N oil on a Cryo-Loop. X-ray Diffraction data was collected at 93 K under a cold nitrogen gas stream on a Rigaku XtaLAB Pro MM007HF X-ray diffractometer system, using graphite-monochromated Mo- $K\alpha$  radiation ( $\lambda = 0.71073$  Å). Intensity data were collected by an  $\omega$ -scan with  $0.5^\circ$  oscillations for each frame. Bragg spots were integrated using the CrysAlis<sup>Pro</sup> program package.<sup>S3</sup> Structures were solved by SHELXT<sup>S4</sup> and refined by SHELXL.<sup>S5</sup> All non-disordered non-hydrogen atoms were refined with anisotropic displacement parameters. Hydrogen atoms were placed at calculated positions and refined by applying riding models. CCDC reference numbers are 2026816 for **1DOR**, 2026817 for **2DOR**,

2026818 for **3DOR**, and 2026819 for **3DGR**, respectively.

The lowest triplet excited ( $T_1$ ) states were optimized by density functional theory (DFT) calculations at gas-phase conditions.<sup>S6</sup> The input coordinates were extracted from the X-ray crystallographic data. The crystalline solvents THF or acetone molecules were fixed (opt = modredundant) in structural optimization calculations. The UM06 level of theory<sup>S7</sup> were used for geometry optimizations using Gaussian 16, C. 01.<sup>S8</sup> The def2-TZVP basis set for Au atoms, def2-SV basis set for other atoms, were used.<sup>S9</sup> Time dependent (TD)-DFT calculations were performed on the optimized  $T_1$  geometries: the M06 level of theory, def2-TZVP for Au and I atoms, and def2-SVP for other atoms were applied. All calculations were performed with tight criteria. Natural transition orbitals (NTOs) were generated by orbital transformation followed by a singular value decomposition of the transition density matrix. In the NTO representation, the electronic transitions can be expressed by one single “hole (approximately HOMO) - electron (approximately LUMO)” pair with an associated eigenvalue of essentially one, even for transitions that are highly mixed in the canonical MO basis. This procedure can be a helpful strategy for obtaining a simple orbital interpretation of “what got excited to where”.<sup>S10</sup> Perturbative spin-orbit coupling calculations (pSOC-TD-DFT) were performed to understand singlet and triplet contributions to the excitations with the ADF2019.303 package<sup>S11</sup> on the previously optimized  $T_1$  structures. The M06 level of theory, TZP for Au and I atoms, and DZP for other atoms were applied.

## 2. Crystal Structure determination

Table S1. Crystallographic data for 1DOR and 2DOR.

|                                                                                                  | 1DOR                                                                                          | 2DOR                                                                                          |
|--------------------------------------------------------------------------------------------------|-----------------------------------------------------------------------------------------------|-----------------------------------------------------------------------------------------------|
| formula                                                                                          | C <sub>50</sub> H <sub>64</sub> Au <sub>2</sub> Cl <sub>2</sub> O <sub>2</sub> P <sub>2</sub> | C <sub>50</sub> H <sub>64</sub> Au <sub>2</sub> Br <sub>2</sub> O <sub>2</sub> P <sub>2</sub> |
| formula weight                                                                                   | 1223.80                                                                                       | 1312.70                                                                                       |
| cryst syst                                                                                       | orthorhombic                                                                                  | orthorhombic                                                                                  |
| space group                                                                                      | <i>P</i> 2 <sub>1</sub> 2 <sub>1</sub> 2 <sub>1</sub>                                         | <i>P</i> 2 <sub>1</sub> 2 <sub>1</sub> 2 <sub>1</sub>                                         |
| <i>a</i> / Å                                                                                     | 13.9885(6)                                                                                    | 14.0829(7)                                                                                    |
| <i>b</i> / Å                                                                                     | 16.7416(7)                                                                                    | 16.7889(7)                                                                                    |
| <i>c</i> / Å                                                                                     | 20.1362(7)                                                                                    | 20.2432(8)                                                                                    |
| $\alpha$ / deg                                                                                   | 90                                                                                            | 90                                                                                            |
| $\beta$ / deg                                                                                    | 90                                                                                            | 90                                                                                            |
| $\gamma$ / deg                                                                                   | 90                                                                                            | 90                                                                                            |
| <i>V</i> / Å <sup>3</sup>                                                                        | 4715.7(3)                                                                                     | 4786.2(4)                                                                                     |
| <i>Z</i>                                                                                         | 4                                                                                             | 4                                                                                             |
| <i>d</i> <sub>calcd</sub> / g cm <sup>-3</sup>                                                   | 1.724                                                                                         | 1.822                                                                                         |
| <i>T</i> / K                                                                                     | 93(2)                                                                                         | 93(2)                                                                                         |
| radiation                                                                                        | Mo K $\alpha$                                                                                 | Mo K $\alpha$                                                                                 |
|                                                                                                  | ( $\lambda$ = 0.71073 Å)                                                                      | ( $\lambda$ = 0.71073 Å)                                                                      |
| $\mu$ / cm <sup>-1</sup>                                                                         | 6.434                                                                                         | 7.898                                                                                         |
| diffractometer                                                                                   | Rigaku XtaLAB Pro                                                                             | Rigaku XtaLAB Pro                                                                             |
|                                                                                                  | MM007HF                                                                                       | MM007HF                                                                                       |
| max 2 $\theta$ / deg                                                                             | 60                                                                                            | 60                                                                                            |
| reflns colled                                                                                    | 33517                                                                                         | 32230                                                                                         |
| indep reflns                                                                                     | 14933                                                                                         | 15027                                                                                         |
|                                                                                                  | ( <i>R</i> <sub>int</sub> = 0.0437)                                                           | ( <i>R</i> <sub>int</sub> = 0.0440)                                                           |
| no. of param refined                                                                             | 531                                                                                           | 531                                                                                           |
| <i>R</i> <i>I</i> , <sup>[a]</sup> <i>wR</i> 2 ( <i>I</i> > 2 $\sigma$ <i>I</i> ) <sup>[b]</sup> | 0.0291, 0.0602                                                                                | 0.0311, 0.0590                                                                                |
| <i>S</i>                                                                                         | 1.013                                                                                         | 1.041                                                                                         |

[a]  $R I = \sum |F_o| - |F_c| / \sum |F_o|$ . [b]  $wR2 = [\sum w(|F_o| - |F_c|)^2 / \sum w|F_o|^2]^{1/2}$

**Table S2.** Crystallographic data for **3DOR** and **3DGR**.

|                                                                                                  | <b>3DOR</b>                                                                                  | <b>3DGR</b>                                                                                  |
|--------------------------------------------------------------------------------------------------|----------------------------------------------------------------------------------------------|----------------------------------------------------------------------------------------------|
| formula                                                                                          | C <sub>50</sub> H <sub>64</sub> Au <sub>2</sub> I <sub>2</sub> O <sub>2</sub> P <sub>2</sub> | C <sub>48</sub> H <sub>60</sub> Au <sub>2</sub> I <sub>2</sub> O <sub>2</sub> P <sub>2</sub> |
| formula weight                                                                                   | 1406.70                                                                                      | 1378.64                                                                                      |
| cryst syst                                                                                       | orthorhmbic                                                                                  | orthorhmbic                                                                                  |
| space group                                                                                      | <i>P</i> 2 <sub>1</sub> 2 <sub>1</sub> 2 <sub>1</sub>                                        | <i>P</i> dd2                                                                                 |
| <i>a</i> / Å                                                                                     | 14.06858(18)                                                                                 | 29.5244(5)                                                                                   |
| <i>b</i> / Å                                                                                     | 17.0216(2)                                                                                   | 28.5111(5)                                                                                   |
| <i>c</i> / Å                                                                                     | 20.3878(2)                                                                                   | 11.30808(18)                                                                                 |
| $\alpha$ / deg                                                                                   | 90                                                                                           | 90                                                                                           |
| $\beta$ / deg                                                                                    | 90                                                                                           | 90                                                                                           |
| $\gamma$ / deg                                                                                   | 90                                                                                           | 90                                                                                           |
| <i>V</i> / Å <sup>3</sup>                                                                        | 4882.26(10)                                                                                  | 9518.8(3)                                                                                    |
| <i>Z</i>                                                                                         | 4                                                                                            | 8                                                                                            |
| <i>d</i> <sub>calcd</sub> / g cm <sup>-3</sup>                                                   | 1.914                                                                                        | 1.924                                                                                        |
| <i>T</i> / K                                                                                     | 93(2)                                                                                        | 93(2)                                                                                        |
| radiation                                                                                        | Mo K $\alpha$<br>( $\lambda$ = 0.71073 Å)                                                    | Mo K $\alpha$<br>( $\lambda$ = 0.71073 Å)                                                    |
| $\mu$ / cm <sup>-1</sup>                                                                         | 7.370                                                                                        | 7.558                                                                                        |
| diffractometer                                                                                   | Rigaku XtaLAB Pro<br>MM007HF                                                                 | Rigaku XtaLAB Pro<br>MM007HF                                                                 |
| max 2 $\theta$ / deg                                                                             | 60                                                                                           | 60                                                                                           |
| reflns collcd                                                                                    | 94419                                                                                        | 61648                                                                                        |
| indep reflns                                                                                     | 15766<br>( <i>R</i> <sub>int</sub> = 0.0260)                                                 | 7505<br>( <i>R</i> <sub>int</sub> = 0.0366)                                                  |
| no. of param refined                                                                             | 531                                                                                          | 259                                                                                          |
| <i>R</i> <i>I</i> , <sup>[a]</sup> <i>wR</i> 2 ( <i>I</i> > 2 $\sigma$ <i>I</i> ) <sup>[b]</sup> | 0.0179, 0.0302                                                                               | 0.0134, 0.0287                                                                               |
| <i>S</i>                                                                                         | 1.041                                                                                        | 1.034                                                                                        |

[a]  $R I = \sum ||F_o| - |F_c|| / \sum |F_o|$ . [b]  $wR2 = [\sum w(|F_o| - |F_c|)^2 / \sum w|F_o|^2]^{1/2}$

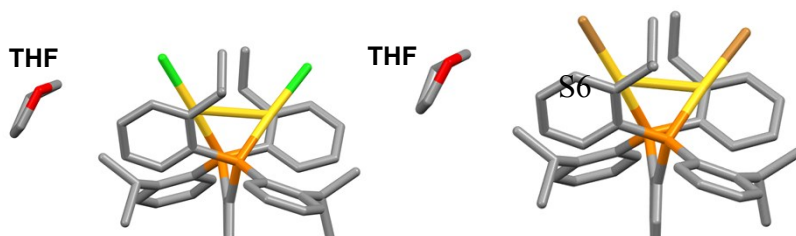

**Fig. S1** Perspective views of **1DOR**, **2DOR**, **3DOR**, and **3DGR**.

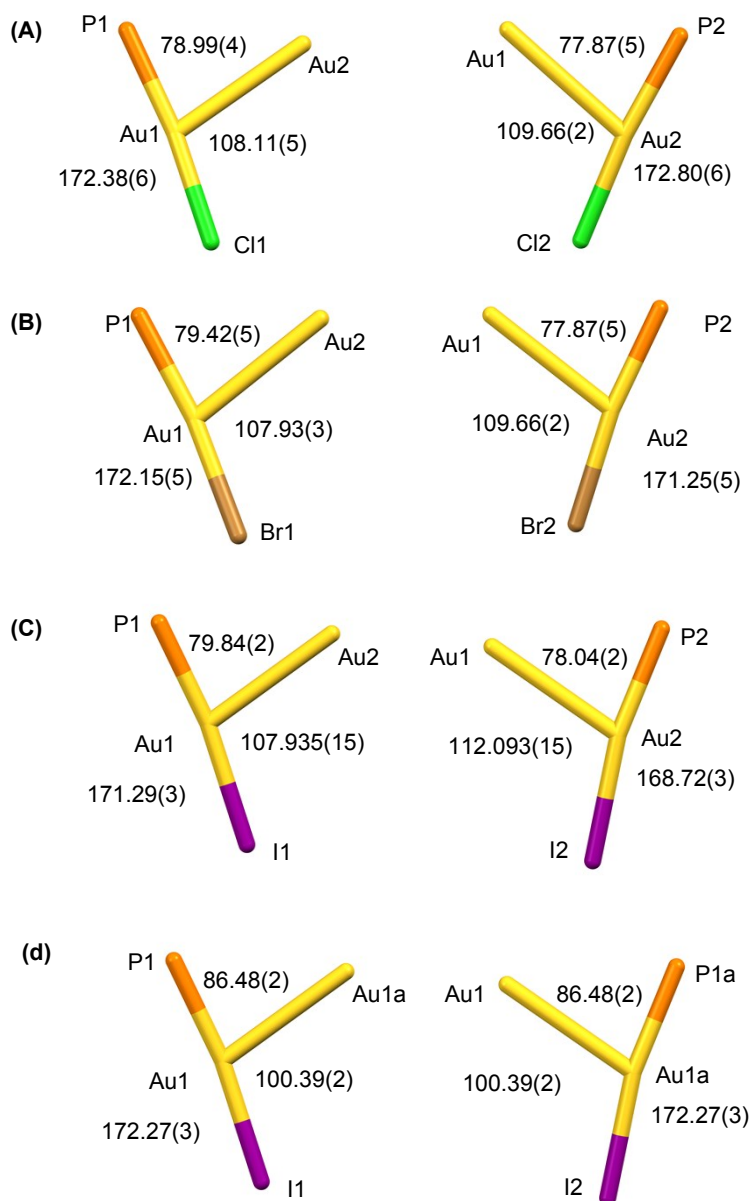

**Fig. S2** Core structures of **1DOR**, **2DOR**, **3DOR** and **3DGR**.

#### 4. NMR Experiments

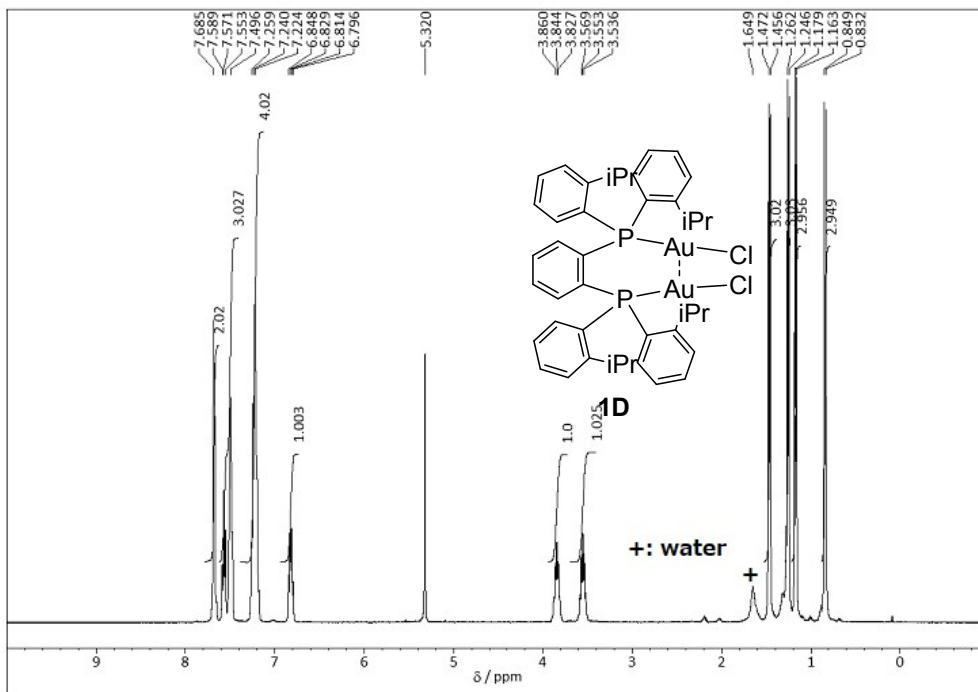

**Fig. S3**  $^1\text{H}$  NMR spectrum of **1D** in  $\text{CD}_2\text{Cl}_2$  at 293 K.

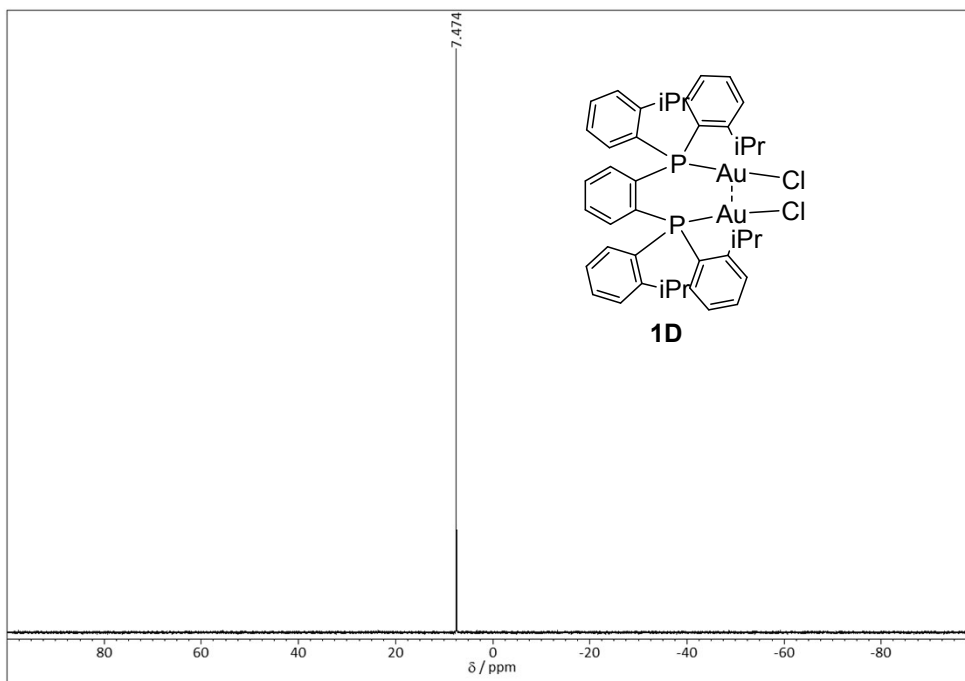



Fig. S4  $^{31}\text{P}$   $\{^1\text{H}\}$  NMR spectrum of **1D** in  $\text{CD}_2\text{Cl}_2$  at 293 K.

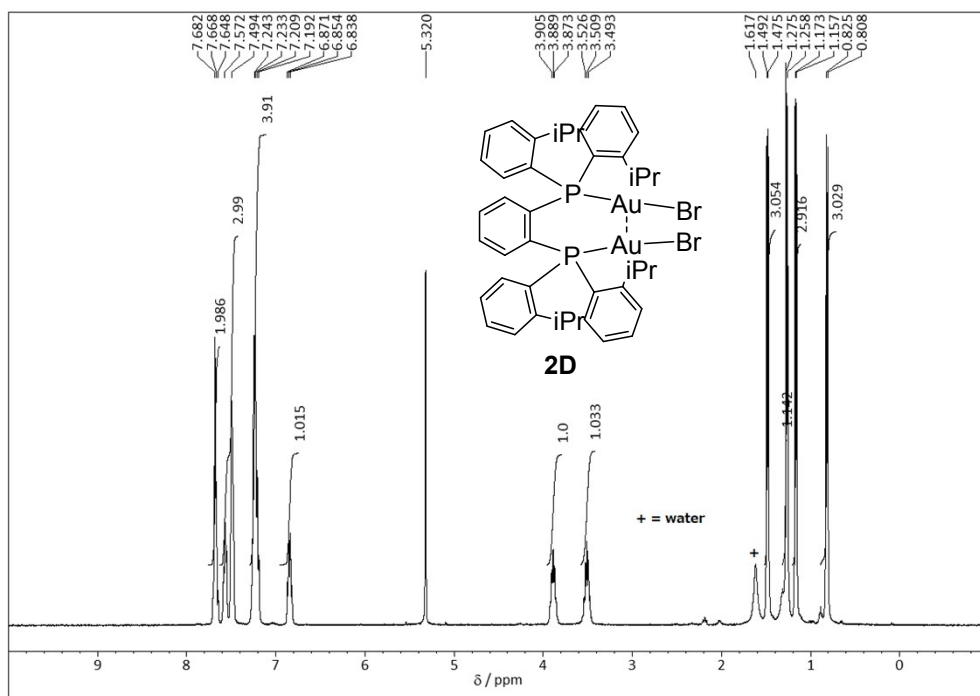

Fig. S5  $^1\text{H}$  NMR spectrum of **2D** in  $\text{CD}_2\text{Cl}_2$  at 293 K.

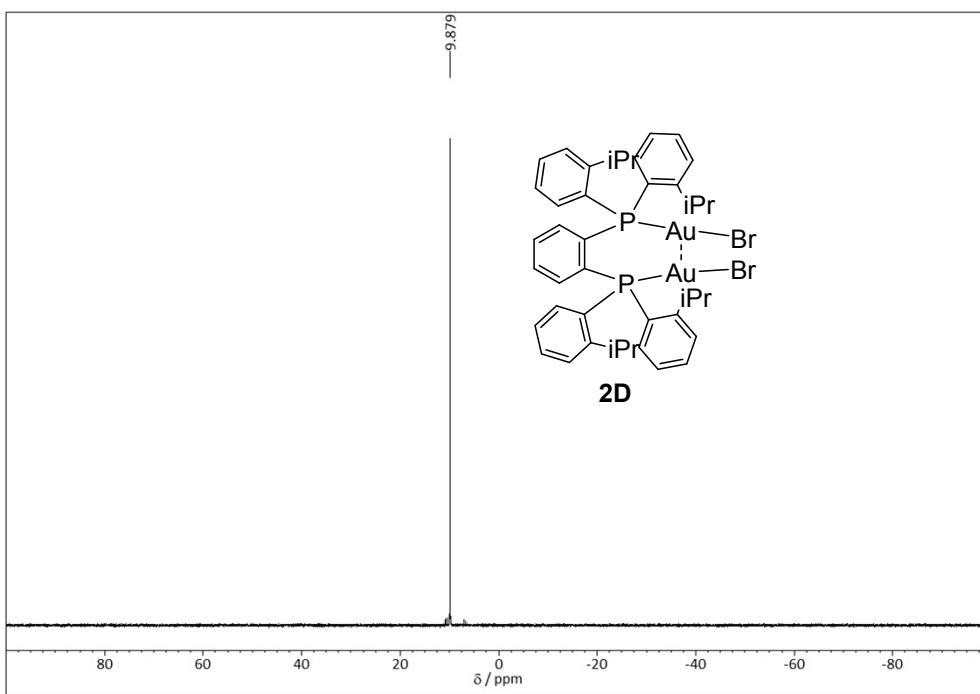

Fig. S6  $^{31}\text{P}$   $\{^1\text{H}\}$  NMR spectrum of **2D** in  $\text{CD}_2\text{Cl}_2$  at 293 K.

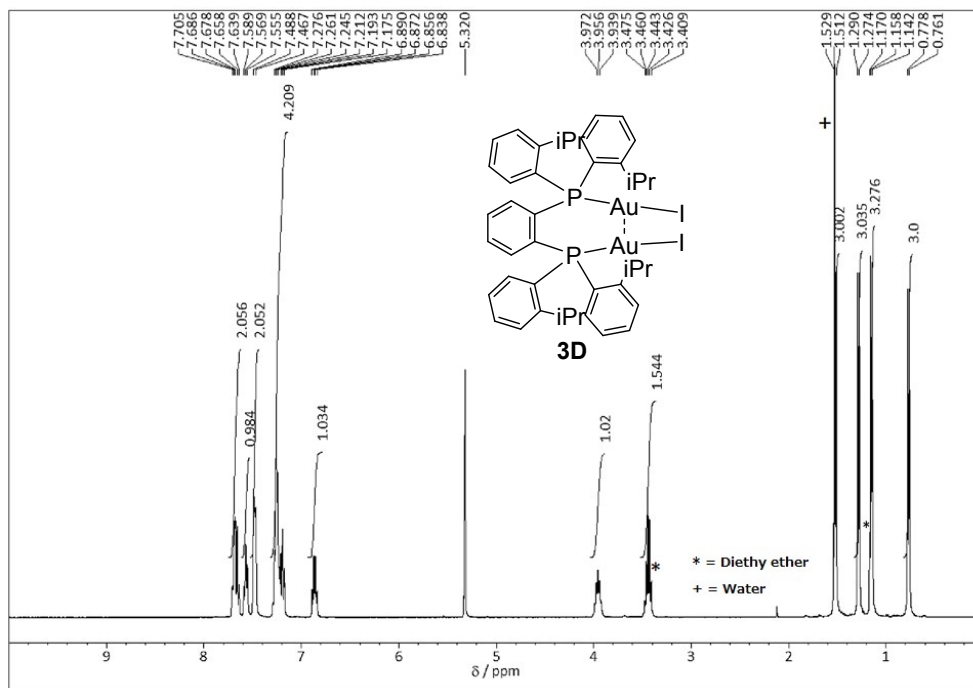

**Fig. S7** <sup>1</sup>H NMR spectrum of **3D** in CD<sub>2</sub>Cl<sub>2</sub> at 293 K.

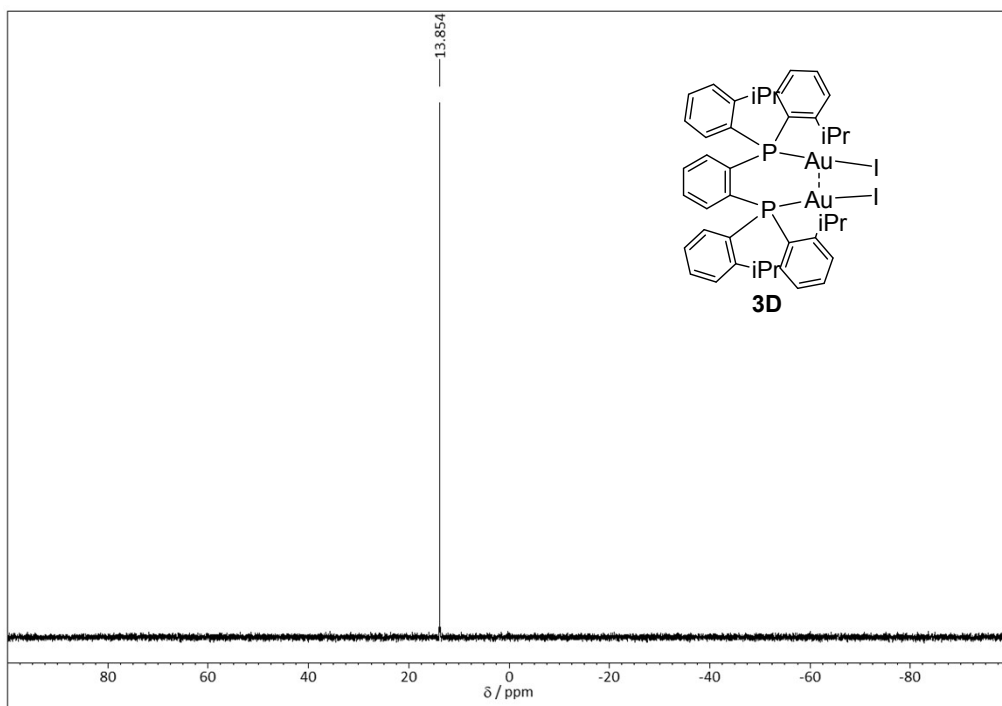

**Fig. S8** <sup>31</sup>P {<sup>1</sup>H} NMR spectrum of **3D** in CD<sub>2</sub>Cl<sub>2</sub> at 293 K.

## 7. Thermogravimetric Analyses

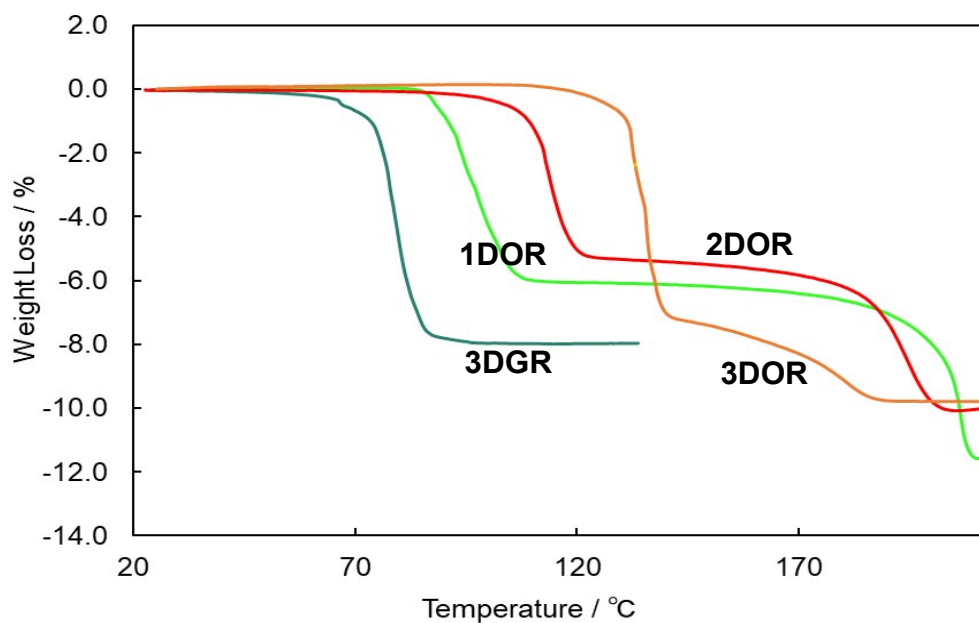

**Fig. S9** TGA data for **1DOR** (green), **2DOR** (red), **3DOR** (orange), and **3DGR** (blue-green) under argon atmosphere with a heating rate of  $20^{\circ}\text{C min}^{-1}$ .

## 4. Photophysical data

**Table S3** Photophysical properties of **1** and **3** in crystals.

|          | 293 K                                                |                                   |                     | 77 K                                                 |                                   |                     | $\Delta E_{S-T} / \text{cm}^{-1}$ (eV) |
|----------|------------------------------------------------------|-----------------------------------|---------------------|------------------------------------------------------|-----------------------------------|---------------------|----------------------------------------|
|          | $\lambda_{\text{max}} / \text{nm}$ (eV) <sup>a</sup> | $\tau / \mu\text{s}$ <sup>b</sup> | $\Phi$ <sup>c</sup> | $\lambda_{\text{max}} / \text{nm}$ (eV) <sup>a</sup> | $\tau / \mu\text{s}$ <sup>b</sup> | $\Phi$ <sup>c</sup> |                                        |
| <b>1</b> | 558(2.222)                                           | 13                                | 0.82                | 582(2.130)                                           | 92                                | 0.58                | 950(0.118) <sup>d</sup>                |
| <b>3</b> | 549(2.258)                                           | 9.0                               | 0.92                | 569(2.179)                                           | 77                                | 0.74                | 870(0.108) <sup>d</sup>                |

<sup>a</sup> Emission maxima;  $\lambda_{\text{exc}} = 355 \text{ nm}$ . <sup>b</sup> Emission decay time;  $\lambda_{\text{exc}} = 355 \text{ nm}$ . <sup>c</sup> Absolute PL quantum yield (error  $\pm 8\%$ );  $\lambda_{\text{exc}} = 355 \text{ nm}$ . <sup>d</sup> Energy gap between  $S_1$  and  $T_1$  levels determined from the temperature dependence of the decay time.

**Table S4** Rate constants and TADF-to-phosphorescence ratios for **1** and **3**.

|          | $k_S (= 1/\tau_S) / \text{s}^{-1}$ | $k_T (= 1/\tau_T) / \text{s}^{-1}$ | $k_S(r) / \text{s}^{-1}$ | $k_S(\text{nr})^a / \text{s}^{-1}$ | $k_T(r) / \text{s}^{-1}$ | $k_T(\text{nr})^b / \text{s}^{-1}$ | $\Phi(\text{TADF}) : \Phi(\text{Phos})$ |         |
|----------|------------------------------------|------------------------------------|--------------------------|------------------------------------|--------------------------|------------------------------------|-----------------------------------------|---------|
|          |                                    |                                    |                          |                                    |                          |                                    | 293 K                                   | 77 K    |
| <b>1</b> | $2.00 \times 10^7$                 | $1.09 \times 10^4$                 | $1.73 \times 10^7$       | $2.70 \times 10^6$                 | $6.20 \times 10^3$       | $4.70 \times 10^3$                 | 5 : 95                                  | 0 : 100 |
| <b>3</b> | $2.05 \times 10^7$                 | $1.30 \times 10^4$                 | $1.93 \times 10^7$       | $1.02 \times 10^6$                 | $9.61 \times 10^3$       | $3.39 \times 10^3$                 | 10 : 90                                 | 0 : 100 |

<sup>a</sup>  $k_S(\text{nr}) = k_S - k_S(r)$ , <sup>b</sup>  $k_T(\text{nr}) = k_T - k_T(r)$

## 5. Theoretical Studies

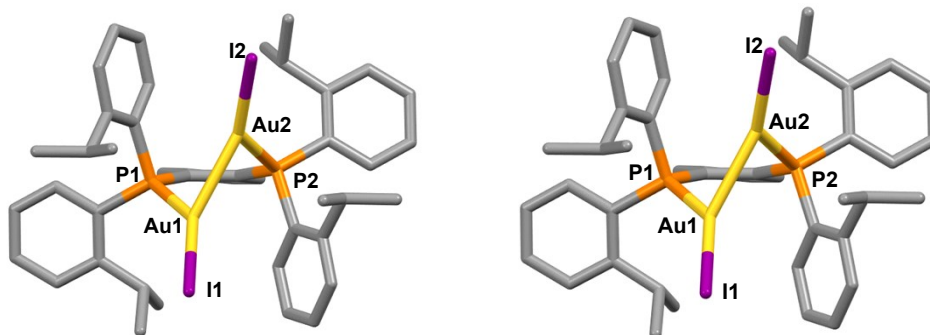

**Fig. S10** DFT-optimized structures of **3DOR** (left) and **3DGR** (right) in  $T_1$  states without crystallization solvents.

**Table S5** Selected bond distances (Å) and angles (°) for **3DOR** and **3DGR** at  $T_1$  optimized structures

|            | <b>3DOR</b> | <b>3DGR</b> |
|------------|-------------|-------------|
| Au1–P1     | 2.476       | 2.477       |
| Au1–I1     | 2.663       | 2.663       |
| Au2–P2     | 2.477       | 2.477       |
| Au2–I2     | 2.662       | 2.663       |
| Au1–Au2    | 2.745       | 2.745       |
| P1–Au1–I1  | 135.74      | 135.99      |
| P1–Au1–Au2 | 80.77       | 80.85       |
| Au2–Au1–I1 | 142.41      | 142.44      |
| P2–Au2–I2  | 136.11      | 136.04      |
| P2–Au2–Au1 | 80.83       | 80.85       |
| Au1–Au2–I2 | 142.75      | 143.40      |

**Table S6** Composition of hole and electron for **3DOR** at the T<sub>1</sub> optimized structure.<sup>a</sup>

|                               | percentage composition (%) <sup>b</sup> |          |            |
|-------------------------------|-----------------------------------------|----------|------------|
|                               | hole                                    | electron | Difference |
| Au1                           | 15                                      | 26       | -11        |
| Au2                           | 14                                      | 26       | -14        |
| I1                            | 21                                      | 8        | 13         |
| I2                            | 20                                      | 8        | 12         |
| P1                            | 11                                      | 8        | 3          |
| P2                            | 10                                      | 8        | 2          |
| phenylene (L <sub>iPr</sub> ) | 3                                       | 8        | -5         |

<sup>a</sup> The optimized T<sub>1</sub> geometry was obtained by unrestricted (U)-DFT. <sup>b</sup> The atomic component was evaluated by the Mulliken analysis.

**Table S7** NTO analysis for selected transitions of **3DGR** at the T<sub>1</sub> optimized structures.

| States         | $\lambda_{\text{cal}} / \text{eV}$ | $f$   | NTO pairs                                                                            |          | Generation probability (%) | Character |
|----------------|------------------------------------|-------|--------------------------------------------------------------------------------------|----------|----------------------------|-----------|
|                |                                    |       | Hole                                                                                 | Electron |                            |           |
| T <sub>1</sub> | 1.702                              | 0.000 | 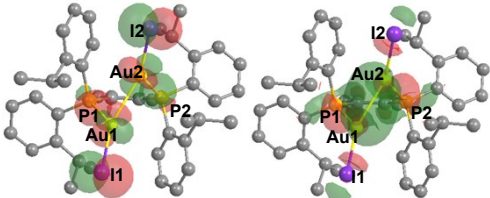 | 99       | XMMCT<br>MC                |           |
| S <sub>1</sub> | 2.054                              | 0.051 |  | 99       | XMMCT<br>MC                |           |

**Table S8** Composition of hole and electron for **3DGR** at the  $T_1$  optimized structure.<sup>a</sup>

|                               | percentage composition (%) <sup>b</sup> |          |            |
|-------------------------------|-----------------------------------------|----------|------------|
|                               | hole                                    | electron | Difference |
| Au1                           | 14                                      | 26       | -12        |
| Au2                           | 14                                      | 26       | -14        |
| I1                            | 21                                      | 8        | 13         |
| I2                            | 20                                      | 8        | 12         |
| P1                            | 10                                      | 8        | 2          |
| P2                            | 10                                      | 8        | 2          |
| phenylene (L <sub>iPr</sub> ) | 3                                       | 9        | -6         |

<sup>a</sup> The optimized  $T_1$  geometry was obtained by unrestricted (U)-DFT. <sup>b</sup> The atomic component was evaluated by the Mulliken analysis.

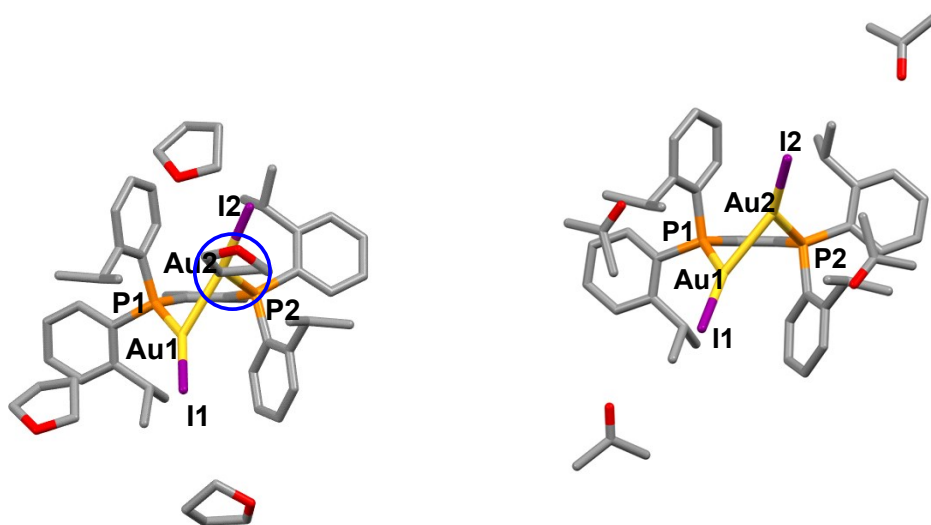

**Fig. S11** DFT-optimized structures of **3DOR** (left) and **3DGR** (right) in  $T_1$  states with crystallization solvents.

**Table S9** Selected bond distances (Å) and angles (°) for **3DOR** and **3DGR** at T<sub>1</sub> optimized structures including crystalline solvent molecules.

|            | <b>3DOR</b> | <b>3DGR</b> |
|------------|-------------|-------------|
| Au1–P1     | 2.434       | 2.490       |
| Au1–I1     | 2.646       | 2.671       |
| Au2–P2     | 2.503       | 2.491       |
| Au2–I2     | 2.697       | 2.670       |
| Au1–Au2    | 2.752       | 2.730       |
| P1–Au1–I1  | 152.54      | 140.39      |
| P1–Au1–Au2 | 80.80       | 81.02       |
| Au2–Au1–I1 | 142.24      | 142.96      |
| P2–Au2–I2  | 118.91      | 140.29      |
| P2–Au2–Au1 | 84.65       | 80.83       |
| Au1–Au2–I2 | 125.75      | 142.62      |

**Table S10** NTO analysis for selected transitions of **3DOR** at the T<sub>1</sub> optimized structure with crystalline THF molecules.

| states         | $\lambda_{\text{cal}}$ / eV | $f$   | NTO pairs                                                                           |                                                                                      | Generation probability (%) | Character   |
|----------------|-----------------------------|-------|-------------------------------------------------------------------------------------|--------------------------------------------------------------------------------------|----------------------------|-------------|
|                |                             |       | Hole                                                                                | Electron                                                                             |                            |             |
| T <sub>1</sub> | 1.689                       | 0.000 | 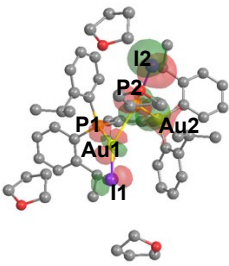 |  | 99                         | XMMCT<br>MC |
| S <sub>1</sub> | 2.046                       | 0.050 |  |  | 99                         | XXMCT<br>MC |

**Table S11** Composition of hole and electron for **3DOR** at the  $T_1$  optimized structure with crystalline THF molecules.

|                               | percentage composition (%) <sup>b</sup> |          |            |
|-------------------------------|-----------------------------------------|----------|------------|
|                               | hole                                    | electron | Difference |
| Au1                           | 9                                       | 22       | -12        |
| Au2                           | 22                                      | 34       | -12        |
| I1                            | 7                                       | 7        | 0          |
| I2                            | 30                                      | 9        | 21         |
| P1                            | 4                                       | 7        | 3          |
| P2                            | 17                                      | 8        | 9          |
| phenylene (L <sub>iPr</sub> ) | 3                                       | 6        | -3         |
| THF                           | 2                                       | 0        | 0          |

<sup>a</sup> The optimized  $T_1$  geometry was obtained by unrestricted (U)-DFT. <sup>b</sup> The atomic component was evaluated by the Mulliken analysis.

**Table S12** NTO analysis for selected transitions of **3DGR** at the  $T_1$  optimized structure with crystalline acetone molecules.

| states | $\lambda_{\text{cal}}$ / eV | $f$   | NTO pairs |          | Generation probability (%) | Character   |
|--------|-----------------------------|-------|-----------|----------|----------------------------|-------------|
|        |                             |       | Hole      | Electron |                            |             |
| $T_1$  | 1.881                       | 0.000 |           |          | 99                         | XMMCT<br>MC |
| $S_1$  | 2.201                       | 0.051 |           |          | 99                         | XMMCT<br>MC |



**Table S13** Composition of hole and electron for **3DGR** at the T<sub>1</sub> optimized structure with crystalline acetone molecules.<sup>a</sup>

|                               | percentage composition (%) <sup>b</sup> |          |            |
|-------------------------------|-----------------------------------------|----------|------------|
|                               | hole                                    | electron | Difference |
| Au1                           | 14                                      | 25       | -11        |
| Au2                           | 14                                      | 25       | -11        |
| I1                            | 22                                      | 8        | 14         |
| I2                            | 22                                      | 8        | 14         |
| P1                            | 9                                       | 8        | 1          |
| P2                            | 9                                       | 8        | 2          |
| phenylene (L <sub>iPr</sub> ) | 2                                       | 10       | -8         |

<sup>a</sup> The optimized T<sub>1</sub> geometry was obtained by unrestricted (U)-DFT. <sup>b</sup> The atomic component was evaluated by the Mulliken analysis.

**Table S14** Major single group excitation contributions for sublevels (M1, M2, and M3) in T<sub>1</sub> states for **3DOR**.

| Excitation | Single group<br>excited states | Excitation<br>energy /eV | weight<br>(sum=1) | Contribution<br>to f |
|------------|--------------------------------|--------------------------|-------------------|----------------------|
| M1:        | Triplet 1A                     | 1.5993                   | 0.9167            |                      |
| M1:        | Triplet 2A                     | 2.2501                   | 0.0194            |                      |
| M1:        | Triplet 2A                     | 2.2501                   | 0.0194            |                      |
| M1:        | Triplet 1A                     | 1.5993                   | 0.0128            |                      |
| M1:        | Triplet 1A                     | 1.5993                   | 0.0128            |                      |
| M1:        | Triplet 3A                     | 2.3092                   | 0.0035            |                      |
| M1:        | Triplet 3A                     | 2.3092                   | 0.0035            |                      |
| M1:        | Triplet 3A                     | 2.3092                   | 0.0025            |                      |
| M1:        | Triplet 4A                     | 2.5527                   | 0.0023            |                      |
| M1:        | Triplet 4A                     | 2.5527                   | 0.0023            |                      |
| <b>M1:</b> | <b>Singlet 2A</b>              | <b>2.3915</b>            | <b>0.0013</b>     | <b>0.3404E-05</b>    |
| M1:        | Triplet 2A                     | 2.2501                   | 0.0007            |                      |
| M1:        | Triplet 5A                     | 2.5974                   | 0.0005            |                      |
| M1:        | Triplet 5A                     | 2.5974                   | 0.0005            |                      |
| M2:        | Triplet 1A                     | 1.5993                   | 0.4713            |                      |
| M2:        | Triplet 1A                     | 1.5993                   | 0.4713            |                      |
| M2:        | Triplet 2A                     | 2.2501                   | 0.0404            |                      |
| M2:        | Triplet 3A                     | 2.3092                   | 0.0067            |                      |
| <b>M2:</b> | <b>Singlet 4A</b>              | <b>2.7289</b>            | <b>0.0018</b>     | <b>0.5470E-05</b>    |
| M2:        | Triplet 3A                     | 2.3092                   | 0.0012            |                      |
| M2:        | Triplet 3A                     | 2.3092                   | 0.0012            |                      |
| M2:        | Triplet 4A                     | 2.5527                   | 0.0010            |                      |
| <b>M2:</b> | <b>Singlet 3A</b>              | <b>2.6030</b>            | <b>0.0010</b>     | <b>0.6993E-05</b>    |
| M2:        | Triplet 1A                     | 1.5993                   | 0.0009            |                      |
| M2:        | Triplet 2A                     | 2.2501                   | 0.0004            |                      |
| M2:        | Triplet 2A                     | 2.2501                   | 0.0004            |                      |
| M2:        | Triplet 8A                     | 3.1811                   | 0.0003            |                      |

|            |                |           |               |               |                   |
|------------|----------------|-----------|---------------|---------------|-------------------|
| M2:        | Triplet        | 8A        | 3.1811        | 0.0003        |                   |
| M3:        | Triplet        | 1A        | 1.5993        | 0.4675        |                   |
| M3:        | Triplet        | 1A        | 1.5993        | 0.4675        |                   |
| <b>M3:</b> | <b>Singlet</b> | <b>2A</b> | <b>2.3915</b> | <b>0.0289</b> | <b>0.7500E-04</b> |
| M3:        | Triplet        | 1A        | 1.5993        | 0.0248        |                   |
| M3:        | Triplet        | 4A        | 2.5527        | 0.0037        |                   |
| M3:        | Triplet        | 2A        | 2.2501        | 0.0008        |                   |
| M3:        | Triplet        | 2A        | 2.2501        | 0.0008        |                   |
| <b>M3:</b> | <b>Singlet</b> | <b>3A</b> | <b>2.6030</b> | <b>0.0008</b> | <b>0.5758E-05</b> |
| M3:        | Triplet        | 3A        | 2.3092        | 0.0008        |                   |
| M3:        | Triplet        | 3A        | 2.3092        | 0.0008        |                   |
| M3:        | Triplet        | 5A        | 2.5974        | 0.0007        |                   |
| <b>M3:</b> | <b>Singlet</b> | <b>4A</b> | <b>2.7289</b> | <b>0.0003</b> | <b>0.1040E-05</b> |
| M3:        | Triplet        | 8A        | 3.1811        | 0.0003        |                   |
| M3:        | Triplet        | 8A        | 3.1811        | 0.0003        |                   |

**Table S15** Major single group excitation contributions for sublevels (M1, M2, and M3) in T<sub>1</sub> states for **3DGR**.

| Excitation | Single group<br>excited states |           | Excitation<br>energy /eV | weight<br>(sum=1) | Contribution<br>to f |
|------------|--------------------------------|-----------|--------------------------|-------------------|----------------------|
| M1:        | Triplet                        | 1A        | 1.7571                   | 0.4545            |                      |
| M1:        | Triplet                        | 1A        | 1.7571                   | 0.4545            |                      |
| M1:        | Triplet                        | 2A        | 2.3788                   | 0.0375            |                      |
| M1:        | Triplet                        | 3A        | 2.4100                   | 0.0238            |                      |
| M1:        | Triplet                        | 2A        | 2.3788                   | 0.0054            |                      |
| M1:        | Triplet                        | 2A        | 2.3788                   | 0.0054            |                      |
| M1:        | Triplet                        | 1A        | 1.7571                   | 0.0044            |                      |
| M1:        | Triplet                        | 3A        | 2.4100                   | 0.0042            |                      |
| M1:        | Triplet                        | 3A        | 2.4100                   | 0.0042            |                      |
| M1:        | Triplet                        | 5A        | 2.6663                   | 0.0015            |                      |
| M1:        | Triplet                        | 5A        | 2.6663                   | 0.0015            |                      |
| <b>M1:</b> | <b>Singlet</b>                 | <b>2A</b> | <b>2.5186</b>            | <b>0.0004</b>     | <b>0.8591E-06</b>    |

|            |                |           |               |               |                   |
|------------|----------------|-----------|---------------|---------------|-------------------|
| M1:        | Triplet        | 7A        | 3.0375        | 0.0004        |                   |
| M1:        | Triplet        | 8A        | 3.2132        | 0.0003        |                   |
| M1:        | Triplet        | 8A        | 3.2132        | 0.0003        |                   |
| M2:        | Triplet        | 1A        | 1.7571        | 0.8924        |                   |
| M2:        | Triplet        | 2A        | 2.3788        | 0.0225        |                   |
| M2:        | Triplet        | 2A        | 2.3788        | 0.0225        |                   |
| M2:        | Triplet        | 1A        | 1.7571        | 0.0138        |                   |
| M2:        | Triplet        | 1A        | 1.7571        | 0.0138        |                   |
| <b>M2:</b> | <b>Singlet</b> | <b>3A</b> | <b>2.5734</b> | <b>0.0105</b> | <b>0.8128E-04</b> |
| M2:        | Triplet        | 3A        | 2.4100        | 0.0099        |                   |
| M2:        | Triplet        | 3A        | 2.4100        | 0.0099        |                   |
| M2:        | Triplet        | 5A        | 2.6663        | 0.0013        |                   |
| M2:        | Triplet        | 2A        | 2.3788        | 0.0008        |                   |
| M2:        | Triplet        | 7A        | 3.0375        | 0.0004        |                   |
| M2:        | Triplet        | 7A        | 3.0375        | 0.0004        |                   |
| M3:        | Triplet        | 1A        | 1.7571        | 0.4545        |                   |
| M3:        | Triplet        | 1A        | 1.7571        | 0.4545        |                   |
| <b>M3:</b> | <b>Singlet</b> | <b>2A</b> | <b>2.5186</b> | <b>0.0391</b> | <b>0.8369E-04</b> |
| M3:        | Triplet        | 1A        | 1.7571        | 0.0237        |                   |
| M3:        | Triplet        | 3A        | 2.4100        | 0.0076        |                   |
| M3:        | Triplet        | 3A        | 2.4100        | 0.0076        |                   |
| M3:        | Triplet        | 2A        | 2.3788        | 0.0027        |                   |
| M3:        | Triplet        | 2A        | 2.3788        | 0.0027        |                   |
| <b>M3:</b> | <b>Singlet</b> | <b>3A</b> | <b>2.5734</b> | <b>0.0019</b> | <b>0.1442E-04</b> |
| M3:        | Triplet        | 5A        | 2.6663        | 0.0013        |                   |
| M3:        | Triplet        | 5A        | 2.6663        | 0.0013        |                   |
| M3:        | Triplet        | 7A        | 3.0375        | 0.0007        |                   |
| M3:        | Triplet        | 2A        | 2.3788        | 0.0004        |                   |
| M3:        | Triplet        | 8A        | 3.2132        | 0.0003        |                   |

**(A) 3DOR**

major transition at  $S_2$   
(96%)

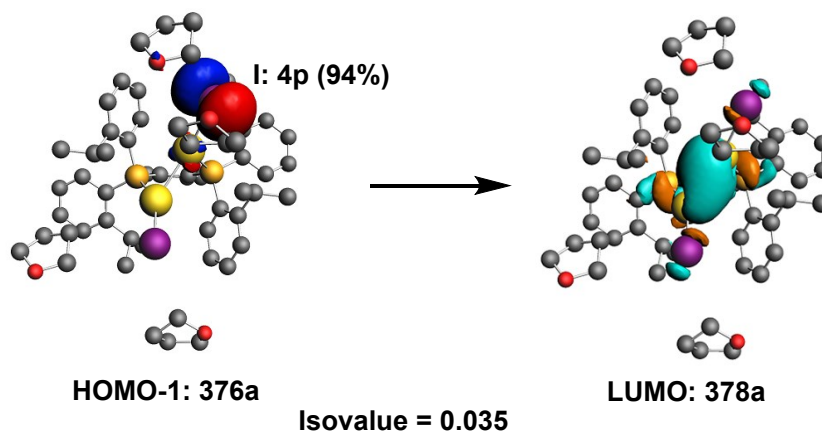

**(B) 3DGR**

major transition at  $S_2$   
(93%)

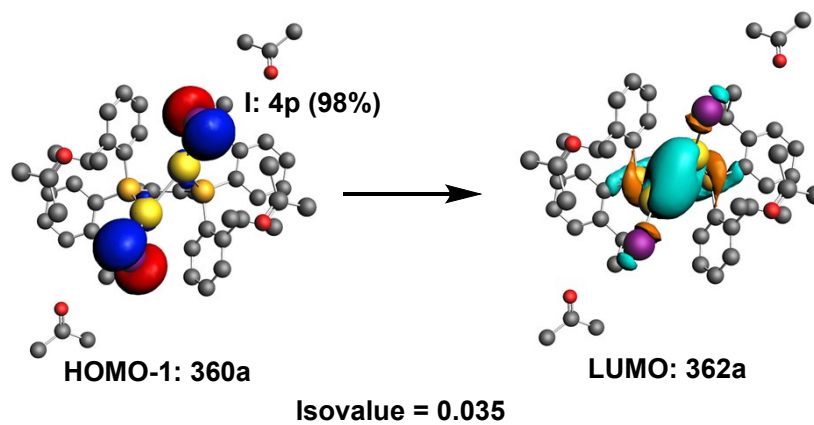

Fig. S12 Major transitions of  $S_2$  states on  $T_1$ -optimized structures of (A) 3DOR and (B) 3DGR

**Table S16** Geometry data of **3DOR** without crystalline solvents for the optimized  $T_1$  state

|    |           |           |           |
|----|-----------|-----------|-----------|
| Au | 9.497733  | 5.992768  | 6.468470  |
| Au | 11.869571 | 4.661064  | 6.835550  |
| I  | 12.993723 | 2.704742  | 8.248479  |
| I  | 6.930318  | 5.622866  | 5.867964  |
| P  | 12.465369 | 5.982386  | 4.828196  |
| C  | 11.767617 | 7.190367  | 8.856830  |
| C  | 11.070690 | 5.855157  | 3.639164  |
| C  | 12.130099 | 8.493800  | 6.248251  |
| C  | 11.167874 | 3.269373  | 3.663772  |
| C  | 10.563208 | 4.596122  | 3.242527  |
| C  | 13.168784 | 7.285556  | 8.873816  |
| C  | 10.448521 | 7.033438  | 3.195403  |
| C  | 9.118436  | 10.072277 | 7.149773  |
| C  | 12.691099 | 7.780983  | 5.157143  |
| C  | 11.092379 | 6.521561  | 9.904014  |
| C  | 13.978370 | 5.549725  | 3.869502  |
| C  | 9.322967  | 6.986104  | 2.380358  |
| C  | 9.431596  | 4.581522  | 2.420074  |
| C  | 9.155967  | 4.904937  | 9.921184  |
| C  | 10.192217 | 2.438252  | 4.495887  |
| C  | 10.013407 | 9.375226  | 7.992777  |
| C  | 15.229498 | 5.438005  | 4.517281  |
| C  | 12.523098 | 9.830649  | 6.447511  |
| C  | 16.342301 | 5.110502  | 3.732687  |
| C  | 13.883053 | 5.330045  | 2.486497  |
| C  | 9.584108  | 6.370743  | 9.978583  |
| C  | 8.806044  | 9.654185  | 5.724991  |
| C  | 13.397717 | 10.478993 | 5.585897  |
| C  | 11.868766 | 5.960882  | 10.923970 |
| C  | 8.514420  | 11.229691 | 7.656398  |
| P  | 10.851679 | 7.843363  | 7.404151  |
| C  | 16.241599 | 4.889900  | 2.362844  |
| C  | 15.434353 | 5.682669  | 6.000732  |
| C  | 8.766226  | 11.691774 | 8.944228  |
| C  | 13.257175 | 6.043120  | 10.927846 |
| C  | 13.912793 | 6.715967  | 9.901229  |
| C  | 11.668525 | 2.468661  | 2.463475  |
| C  | 8.808333  | 5.751048  | 1.997558  |
| C  | 16.125314 | 4.505826  | 6.681789  |
| C  | 10.267139 | 9.848144  | 9.289716  |
| C  | 9.007390  | 7.053010  | 11.217309 |
| C  | 13.887660 | 9.801847  | 4.470428  |
| C  | 9.438253  | 10.604420 | 4.709513  |
| C  | 15.003978 | 4.999077  | 1.733093  |
| C  | 9.648376  | 10.997530 | 9.768843  |
| C  | 13.544735 | 8.470579  | 4.275470  |
| C  | 16.193288 | 6.983413  | 6.256796  |
| C  | 7.305797  | 9.521363  | 5.484631  |
| H  | 12.050268 | 3.471495  | 4.306579  |
| H  | 13.694394 | 7.804973  | 8.062465  |
| H  | 10.842769 | 8.010920  | 3.500402  |
| H  | 8.846696  | 7.916435  | 2.050245  |

|   |           |           |           |
|---|-----------|-----------|-----------|
| H | 9.014107  | 3.615745  | 2.109354  |
| H | 9.565303  | 4.391594  | 9.028742  |
| H | 8.052686  | 4.832544  | 9.873662  |
| H | 9.494974  | 4.348631  | 10.817148 |
| H | 9.811880  | 3.003087  | 5.369550  |
| H | 10.695698 | 1.529441  | 4.877080  |
| H | 9.319214  | 2.116671  | 3.894557  |
| H | 12.127397 | 10.385145 | 7.306543  |
| H | 17.325063 | 5.025785  | 4.213177  |
| H | 12.912458 | 5.435921  | 1.986016  |
| H | 9.134531  | 6.873089  | 9.096650  |
| H | 9.244192  | 8.648631  | 5.553990  |
| H | 13.684312 | 11.518307 | 5.781486  |
| H | 11.366451 | 5.427364  | 11.740483 |
| H | 7.821181  | 11.790583 | 7.017177  |
| H | 17.136343 | 4.633159  | 1.784021  |
| H | 14.437261 | 5.783833  | 6.477912  |
| H | 8.271450  | 12.601201 | 9.304294  |
| H | 13.829086 | 5.576625  | 11.737786 |
| H | 15.005929 | 6.794801  | 9.894178  |
| H | 10.835772 | 2.185857  | 1.790414  |
| H | 12.150138 | 1.532838  | 2.803862  |
| H | 12.410057 | 3.032681  | 1.867269  |
| H | 7.914067  | 5.695357  | 1.366758  |
| H | 15.600450 | 3.553433  | 6.478560  |
| H | 16.133705 | 4.647930  | 7.779259  |
| H | 17.177351 | 4.399960  | 6.351365  |
| H | 10.976997 | 9.313431  | 9.933058  |
| H | 9.373097  | 6.577786  | 12.148346 |
| H | 7.904131  | 6.973009  | 11.217370 |
| H | 9.268133  | 8.127256  | 11.259463 |
| H | 14.549290 | 10.303833 | 3.755694  |
| H | 9.038743  | 11.632075 | 4.820639  |
| H | 9.210863  | 10.272289 | 3.677695  |
| H | 10.538748 | 10.658132 | 4.816481  |
| H | 14.909612 | 4.834842  | 0.653535  |
| H | 9.862540  | 11.352867 | 10.783328 |
| H | 13.959148 | 7.945253  | 3.406978  |
| H | 17.208349 | 6.949013  | 5.813471  |
| H | 16.314043 | 7.150765  | 7.344967  |
| H | 15.670350 | 7.861942  | 5.832421  |
| H | 6.831091  | 8.859691  | 6.233356  |
| H | 7.114602  | 9.079037  | 4.488385  |
| H | 6.795515  | 10.504113 | 5.516227  |

**Table S17** Geometry data of **3DGR** without crystalline solvents for the optimized  $T_1$  state

|    |           |           |           |
|----|-----------|-----------|-----------|
| Au | 21.731935 | 22.692097 | 15.669754 |
| I  | 21.820362 | 24.932293 | 14.232955 |
| P  | 20.430968 | 21.870739 | 17.611539 |
| C  | 19.053463 | 22.895617 | 18.280659 |
| C  | 20.617874 | 24.937000 | 18.530392 |
| C  | 19.271648 | 24.245186 | 18.638314 |
| C  | 20.530047 | 26.227401 | 17.722036 |



|   |           |           |           |   |           |           |           |
|---|-----------|-----------|-----------|---|-----------|-----------|-----------|
| C | 9.217581  | 6.844495  | 2.526166  | H | 13.792014 | 4.914173  | 11.654323 |
| C | 9.234506  | 4.441599  | 2.449164  | H | 14.985891 | 6.100311  | 9.797070  |
| C | 9.015527  | 4.707729  | 10.057843 | H | 10.506837 | 2.018514  | 1.662162  |
| C | 10.022493 | 2.167696  | 4.398796  | H | 11.863990 | 1.295433  | 2.565454  |
| C | 10.060665 | 9.082115  | 8.043266  | H | 12.101331 | 2.827384  | 1.676084  |
| C | 15.120103 | 5.003838  | 4.577328  | H | 7.703954  | 5.660106  | 1.523764  |
| C | 12.599051 | 9.425632  | 6.554684  | H | 15.719868 | 3.103483  | 6.453385  |
| C | 16.230493 | 4.668425  | 3.792694  | H | 16.070476 | 4.191594  | 7.820641  |
| C | 13.783583 | 4.945320  | 2.534577  | H | 17.187690 | 4.136490  | 6.431249  |
| C | 9.558066  | 6.134554  | 10.134838 | H | 10.946420 | 8.998555  | 10.016583 |
| C | 8.976732  | 9.391171  | 5.718808  | H | 9.474634  | 6.298842  | 12.317887 |
| C | 13.478403 | 10.058230 | 5.685435  | H | 7.989721  | 6.814594  | 11.479396 |
| C | 11.838559 | 5.505897  | 10.954539 | H | 9.430022  | 7.874777  | 11.471984 |
| C | 8.665489  | 10.999583 | 7.623037  | H | 14.568743 | 9.881473  | 3.818547  |
| P | 10.837697 | 7.505592  | 7.493254  | H | 9.147431  | 11.370553 | 4.792595  |
| C | 16.133932 | 4.467753  | 2.419292  | H | 9.451766  | 10.002825 | 3.687031  |
| C | 15.320374 | 5.225262  | 6.065996  | H | 10.694233 | 10.475953 | 4.886853  |
| C | 8.890873  | 11.468096 | 8.914485  | H | 14.811338 | 4.453958  | 0.701486  |
| C | 13.227189 | 5.461471  | 10.890802 | H | 9.897971  | 11.105189 | 10.798772 |
| C | 13.891240 | 6.116940  | 9.858436  | H | 13.888456 | 7.550943  | 3.444877  |
| C | 11.384790 | 2.254707  | 2.294033  | H | 16.995953 | 6.617910  | 5.900259  |
| C | 8.637037  | 5.650075  | 2.104033  | H | 16.115716 | 6.702140  | 7.450995  |
| C | 16.118500 | 4.099764  | 6.718739  | H | 15.404647 | 7.427583  | 5.976726  |
| C | 10.285869 | 9.558528  | 9.342273  | H | 7.041496  | 8.436013  | 6.093971  |
| C | 9.095058  | 6.821439  | 11.418422 | H | 7.363699  | 8.828619  | 4.387366  |
| C | 13.908532 | 9.389641  | 4.541476  | H | 6.920060  | 10.136098 | 5.525201  |
| C | 9.605209  | 10.364049 | 4.723431  | O | 8.558996  | -2.070995 | 8.721992  |
| C | 14.902523 | 4.604454  | 1.783210  | C | 8.635081  | -1.907963 | 7.294069  |
| C | 9.705241  | 10.744368 | 9.781854  | C | 9.399025  | -0.622980 | 7.099082  |
| C | 13.513099 | 8.075141  | 4.331602  | C | 8.822008  | 0.253877  | 8.215994  |
| C | 15.987995 | 6.569299  | 6.358307  | C | 8.388027  | -0.759022 | 9.276894  |
| C | 7.493445  | 9.192961  | 5.425598  | H | 7.728961  | -1.843009 | 6.898968  |
| H | 11.896928 | 3.156876  | 4.157069  | H | 9.112002  | -2.669053 | 6.877972  |
| H | 13.688005 | 7.292403  | 8.075513  | H | 9.227854  | -0.231912 | 6.206935  |
| H | 10.804636 | 7.761583  | 3.643035  | H | 10.373060 | -0.761002 | 7.214005  |
| H | 8.769070  | 7.810142  | 2.256561  | H | 9.508029  | 0.871023  | 8.574018  |
| H | 8.769140  | 3.507809  | 2.110214  | H | 8.050975  | 0.782038  | 7.890976  |
| H | 9.359174  | 4.188983  | 9.141196  | H | 8.939008  | -0.656987 | 10.093046 |
| H | 7.908682  | 4.717779  | 10.040110 | H | 7.437955  | -0.611983 | 9.520026  |
| H | 9.333890  | 4.102292  | 10.928975 | O | 4.098007  | 8.250999  | 9.305013  |
| H | 9.707885  | 2.694082  | 5.321998  | C | 6.383927  | 7.774980  | 8.934929  |
| H | 10.523802 | 1.228379  | 4.699780  | C | 4.866036  | 9.058951  | 10.191910 |
| H | 9.105937  | 1.903842  | 3.835251  | C | 6.237927  | 9.141910  | 9.585995  |
| H | 12.245782 | 9.976835  | 7.434125  | C | 4.976050  | 7.534036  | 8.434067  |
| H | 17.208674 | 4.557369  | 4.276349  | H | 7.035061  | 7.797004  | 8.189970  |
| H | 12.817286 | 5.076227  | 2.031711  | H | 6.659972  | 7.088035  | 9.592081  |
| H | 9.110392  | 6.698010  | 9.289526  | H | 4.905998  | 8.647996  | 11.091052 |
| H | 9.457581  | 8.405978  | 5.551786  | H | 4.466979  | 9.962042  | 10.272019 |
| H | 13.811811 | 11.080447 | 5.896350  | H | 6.929044  | 9.286022  | 10.281032 |
| H | 11.328139 | 4.990522  | 11.777689 | H | 6.293012  | 9.868040  | 8.916982  |
| H | 8.025073  | 11.583787 | 6.949419  | H | 4.879983  | 7.858028  | 7.504970  |
| H | 17.027862 | 4.202768  | 1.843037  | H | 4.764992  | 6.565958  | 8.454985  |
| H | 14.321498 | 5.234229  | 6.551542  | O | 5.509096  | 6.440049  | 1.472172  |
| H | 8.428380  | 12.406002 | 9.243144  | C | 5.432912  | 6.603025  | 2.899900  |



|   |           |           |           |
|---|-----------|-----------|-----------|
| C | 4.669027  | 7.887730  | 3.094035  |
| C | 5.246065  | 8.763840  | 1.977807  |
| C | 5.680905  | 7.751903  | 0.916972  |
| H | 6.339021  | 6.667986  | 3.295034  |
| H | 4.956962  | 5.841940  | 3.315962  |
| H | 4.841176  | 8.279413  | 3.986815  |
| H | 3.694949  | 7.749932  | 2.980086  |
| H | 4.560060  | 9.382084  | 1.619947  |
| H | 6.017790  | 9.292047  | 2.303334  |
| H | 5.128995  | 7.853006  | 0.100958  |
| H | 6.630042  | 7.898053  | 0.673001  |
| O | 11.131999 | 0.259987  | 11.083007 |
| C | 13.418994 | 0.734993  | 11.452999 |
| C | 11.901002 | -0.547997 | 10.196007 |
| C | 13.271996 | -0.631995 | 10.801002 |
| C | 12.010005 | 0.976993  | 11.952992 |
| H | 14.070005 | 0.714001  | 12.198010 |
| H | 13.694003 | 1.423006  | 10.795990 |
| H | 11.940003 | -0.137992 | 9.296989  |
| H | 11.500994 | -1.451008 | 10.116001 |
| H | 13.963007 | -0.775000 | 10.106992 |
| H | 13.327997 | -1.357006 | 11.471010 |
| H | 11.913995 | 0.653000  | 12.883009 |
| H | 11.799002 | 1.945014  | 11.932990 |

**Table S19** Geometry data of **3DGR** with crystalline acetone molecules for the optimized T<sub>1</sub> state

|    |           |          |           |
|----|-----------|----------|-----------|
| Au | 9.340000  | 5.817000 | 6.509000  |
| Au | 11.602000 | 4.299000 | 6.890000  |
| I  | 13.062000 | 2.187000 | 7.715000  |
| I  | 6.917000  | 5.187000 | 5.650000  |
| P  | 12.496000 | 5.586000 | 4.949000  |
| C  | 11.731000 | 6.812000 | 8.940000  |
| C  | 11.181000 | 5.428000 | 3.681000  |
| C  | 12.138000 | 8.120000 | 6.344000  |
| C  | 11.380000 | 2.849000 | 3.665000  |
| C  | 10.759000 | 4.159000 | 3.220000  |
| C  | 13.134000 | 6.858000 | 8.950000  |
| C  | 10.519000 | 6.589000 | 3.246000  |
| C  | 9.199000  | 9.805000 | 7.201000  |
| C  | 12.690000 | 7.395000 | 5.259000  |
| C  | 11.043000 | 6.125000 | 9.968000  |
| C  | 14.084000 | 5.146000 | 4.126000  |
| C  | 9.447000  | 6.513000 | 2.365000  |
| C  | 9.690000  | 4.118000 | 2.319000  |
| C  | 9.008000  | 4.625000 | 9.975000  |
| C  | 10.374000 | 1.997000 | 4.438000  |
| C  | 10.044000 | 9.067000 | 8.063000  |
| C  | 15.291000 | 5.078000 | 4.859000  |
| C  | 12.549000 | 9.452000 | 6.532000  |
| C  | 16.457000 | 4.743000 | 4.160000  |
| C  | 14.086000 | 4.885000 | 2.747000  |
| C  | 9.532000  | 6.057000 | 10.072000 |
| C  | 8.881000  | 9.396000 | 5.773000  |

|   |           |           |           |
|---|-----------|-----------|-----------|
| C | 13.419000 | 10.088000 | 5.656000  |
| C | 11.808000 | 5.480000  | 10.946000 |
| C | 8.659000  | 11.001000 | 7.688000  |
| P | 10.828000 | 7.500000  | 7.492000  |
| C | 16.451000 | 4.479000  | 2.794000  |
| C | 15.397000 | 5.388000  | 6.341000  |
| C | 8.924000  | 11.466000 | 8.972000  |
| C | 13.198000 | 5.502000  | 10.934000 |
| C | 13.867000 | 6.207000  | 9.938000  |
| C | 11.968000 | 2.050000  | 2.506000  |
| C | 9.030000  | 5.268000  | 1.900000  |
| C | 16.178000 | 4.324000  | 7.108000  |
| C | 10.304000 | 9.538000  | 9.359000  |
| C | 9.035000  | 6.729000  | 11.352000 |
| C | 13.883000 | 9.404000  | 4.535000  |
| C | 9.547000  | 10.324000 | 4.758000  |
| C | 15.258000 | 4.551000  | 2.080000  |
| C | 9.749000  | 10.728000 | 9.817000  |
| C | 13.532000 | 8.072000  | 4.357000  |
| C | 16.022000 | 6.763000  | 6.576000  |
| C | 7.380000  | 9.303000  | 5.518000  |
| H | 12.215000 | 3.073000  | 4.360000  |
| H | 13.672000 | 7.402000  | 8.164000  |
| H | 10.837000 | 7.575000  | 3.609000  |
| H | 8.935000  | 7.427000  | 2.044000  |
| H | 9.350000  | 3.142000  | 1.950000  |
| H | 9.372000  | 4.116000  | 9.061000  |
| H | 7.901000  | 4.625000  | 9.938000  |
| H | 9.316000  | 4.015000  | 10.847000 |
| H | 9.958000  | 2.536000  | 5.313000  |
| H | 10.864000 | 1.075000  | 4.806000  |
| H | 9.524000  | 1.699000  | 3.793000  |
| H | 12.166000 | 10.018000 | 7.390000  |
| H | 17.406000 | 4.687000  | 4.707000  |
| H | 13.150000 | 4.959000  | 2.180000  |
| H | 9.095000  | 6.620000  | 9.221000  |
| H | 9.290000  | 8.378000  | 5.605000  |
| H | 13.717000 | 11.126000 | 5.842000  |
| H | 11.292000 | 4.930000  | 11.744000 |
| H | 8.007000  | 11.594000 | 7.033000  |
| H | 17.386000 | 4.216000  | 2.286000  |
| H | 14.372000 | 5.405000  | 6.767000  |
| H | 8.482000  | 12.411000 | 9.313000  |
| H | 13.760000 | 4.970000  | 11.710000 |
| H | 14.963000 | 6.249000  | 9.923000  |
| H | 11.181000 | 1.610000  | 1.862000  |
| H | 12.555000 | 1.199000  | 2.901000  |
| H | 12.643000 | 2.657000  | 1.874000  |
| H | 8.181000  | 5.191000  | 1.211000  |
| H | 15.829000 | 3.304000  | 6.866000  |
| H | 16.043000 | 4.468000  | 8.197000  |
| H | 17.264000 | 4.383000  | 6.898000  |
| H | 10.975000 | 8.971000  | 10.016000 |
| H | 9.413000  | 6.210000  | 12.254000 |

|   |           |           |           |   |           |           |           |
|---|-----------|-----------|-----------|---|-----------|-----------|-----------|
| H | 7.930000  | 6.698000  | 11.396000 | O | 11.132000 | 0.260000  | 11.083000 |
| H | 9.348000  | 7.789000  | 11.414000 | C | 13.419000 | 0.735000  | 11.453000 |
| H | 14.535000 | 9.898000  | 3.806000  | C | 11.901000 | -0.548000 | 10.196000 |
| H | 9.176000  | 11.363000 | 4.860000  | C | 13.272000 | -0.632000 | 10.801000 |
| H | 9.319000  | 9.993000  | 3.726000  | C | 12.010000 | 0.977000  | 11.953000 |
| H | 10.647000 | 10.345000 | 4.873000  | H | 14.070000 | 0.714000  | 12.198000 |
| H | 15.237000 | 4.351000  | 1.002000  | H | 13.694000 | 1.423000  | 10.796000 |
| H | 9.971000  | 11.083000 | 10.830000 | H | 11.940000 | -0.138000 | 9.297000  |
| H | 13.936000 | 7.535000  | 3.491000  | H | 11.501000 | -1.451000 | 10.116000 |
| H | 17.047000 | 6.806000  | 6.158000  | H | 13.963000 | -0.775000 | 10.107000 |
| H | 16.101000 | 6.972000  | 7.661000  | H | 13.328000 | -1.357000 | 11.471000 |
| H | 15.438000 | 7.580000  | 6.112000  | H | 11.914000 | 0.653000  | 12.883000 |
| H | 6.881000  | 8.634000  | 6.244000  | H | 11.799000 | 1.945000  | 11.933000 |
| H | 7.189000  | 8.882000  | 4.512000  |   |           |           |           |
| H | 6.890000  | 10.295000 | 5.565000  |   |           |           |           |
| O | 8.559000  | -2.071000 | 8.722000  |   |           |           |           |
| C | 8.635000  | -1.908000 | 7.294000  |   |           |           |           |
| C | 9.399000  | -0.623000 | 7.099000  |   |           |           |           |
| C | 8.822000  | 0.254000  | 8.216000  |   |           |           |           |
| C | 8.388000  | -0.759000 | 9.277000  |   |           |           |           |
| H | 7.729000  | -1.843000 | 6.899000  |   |           |           |           |
| H | 9.112000  | -2.669000 | 6.878000  |   |           |           |           |
| H | 9.228000  | -0.232000 | 6.207000  |   |           |           |           |
| H | 10.373000 | -0.761000 | 7.214000  |   |           |           |           |
| H | 9.508000  | 0.871000  | 8.574000  |   |           |           |           |
| H | 8.051000  | 0.782000  | 7.891000  |   |           |           |           |
| H | 8.939000  | -0.657000 | 10.093000 |   |           |           |           |
| H | 7.438000  | -0.612000 | 9.520000  |   |           |           |           |
| O | 4.098000  | 8.251000  | 9.305000  |   |           |           |           |
| C | 6.384000  | 7.775000  | 8.935000  |   |           |           |           |
| C | 4.866000  | 9.059000  | 10.192000 |   |           |           |           |
| C | 6.238000  | 9.142000  | 9.586000  |   |           |           |           |
| C | 4.976000  | 7.534000  | 8.434000  |   |           |           |           |
| H | 7.035000  | 7.797000  | 8.190000  |   |           |           |           |
| H | 6.660000  | 7.088000  | 9.592000  |   |           |           |           |
| H | 4.906000  | 8.648000  | 11.091000 |   |           |           |           |
| H | 4.467000  | 9.962000  | 10.272000 |   |           |           |           |
| H | 6.929000  | 9.286000  | 10.281000 |   |           |           |           |
| H | 6.293000  | 9.868000  | 8.917000  |   |           |           |           |
| H | 4.880000  | 7.858000  | 7.505000  |   |           |           |           |
| H | 4.765000  | 6.566000  | 8.455000  |   |           |           |           |
| O | 9.971000  | -0.260000 | 0.889000  |   |           |           |           |
| C | 7.685000  | -0.736000 | 1.259000  |   |           |           |           |
| C | 9.203000  | 0.548000  | 0.002000  |   |           |           |           |
| C | 7.831000  | 0.631000  | 0.608000  |   |           |           |           |
| C | 9.093000  | -0.977000 | 1.760000  |   |           |           |           |
| H | 7.034000  | -0.714000 | 2.004000  |   |           |           |           |
| H | 7.409000  | -1.423000 | 0.602000  |   |           |           |           |
| H | 9.163000  | 0.137000  | -0.897000 |   |           |           |           |
| H | 9.602000  | 1.451000  | -0.078000 |   |           |           |           |
| H | 7.140000  | 0.775000  | -0.087000 |   |           |           |           |
| H | 7.776000  | 1.357000  | 1.277000  |   |           |           |           |
| H | 9.189000  | -0.653000 | 2.689000  |   |           |           |           |
| H | 9.304000  | -1.945000 | 1.739000  |   |           |           |           |

## References

- S1. M. Hoshino, H. Sonoki, Y. Miyazaki, Y. Iimura and K. Yamamoto, *Inorg. Chem.*, 2000, **39**, 4850-4857.
- S2. M. Osawa, I. Kawata, S. Igawa, M. Hoshino, T. Fukunaga and D. Hashizume, *Chem. - Eur. J.*, 2010, 12114-12126.
- S3. Rigaku Oxford Diffraction, CrysAlisPro, Rigaku Corporation, Tokyo, Japan. 2015.
- S4. G. M. Sheldrich, *Acta Cryst.* 2015, **A71**, 3.
- S5. G. M. Sheldrich, *Acta Cryst.* 2015, **C71**, 3.
- S6. R. G. Parr and W. Yang, *Density-functional Theory of Atoms and Molecule*; Oxford University Press: Oxford, U. K., 1994.
- S7. (a) Y. Zhao, D. G. Truhlar, *Acc. Chem. Res.*, 2008, **41**, 157-167; (b) Y. Zhao, D. G. Truhlar, *Theor. Chem. Acc.*, **120**, 215-241.
- S8. Gaussian 16, Revision C.01, M. J. Frisch, G. W. Trucks, H. B. Schlegel, G. E. Scuseria, M. A. Robb, J. R. Cheeseman, G. Scalmani, V. Barone, G. A. Petersson, H. Nakatsuji, X. Li, M. Caricato, A. V. Marenich, J. Bloino, B. G. Janesko, R. Gomperts, B. Mennucci, H. P. Hratchian, J. V. Ortiz, A. F. Izmaylov, J. L. Sonnenberg, D. Williams-Young, F. Ding, F. Lipparini, F. Egidi, J. Goings, B. Peng, A. Petrone, T. Henderson, D. Ranasinghe, V. G. Zakrzewski, J. Gao, N. Rega, G. Zheng, W. Liang, M. Hada, M. Ehara, K. Toyota, R. Fukuda, J. Hasegawa, M. Ishida, T. Nakajima, Y. Honda, O. Kitao, H. Nakai, T. Vreven, K. Throssell, J. A. Montgomery, Jr., J. E. Peralta, F. Ogliaro, M. J. Bearpark, J. J. Heyd, E. N. Brothers, K. N. Kudin, V. N. Staroverov, T. A. Keith, R. Kobayashi, J. Normand, K. Raghavachari, A. P. Rendell, J. C. Burant, S. S. Iyengar, J. Tomasi, M. Cossi, J. M. Millam, M. Klene, C. Adamo, R. Cammi, J. W. Ochterski, R. L. Martin, K. Morokuma, O. Farkas, J. B. Foresman, and D. J. Fox, Gaussian, Inc., Wallingford CT, 2016.
- S9. (a) A. Schaefer, H. Horn, and R. Ahlrichs, *J. Chem. Phys.*, 1992, **97**, 2571-2577; (b) A. Schaefer, C. Huber, and R. Ahlrichs, *J. Chem. Phys.*, 1994, **100**, 5829-5835; (c) F. Weigend, *Phys. Chem. Chem. Phys.*, 2006, **8**, 1057-1065; (d) F. Weigend and R. Ahlrichs, *Phys. Chem. Chem. Phys.*, 2005, **7**, 3297-3305.
- S10. (a) R. L. Martin, *J. Chem. Phys.*, 2003, **118**, 4775-4777; (b) E. R. Batista and R. L.; Martin, *J. Phys. Chem. A*, 2005, **109**, 3128-3133; (c) E. R. Batista and R. L. Martin, *J. Phys. Chem. A*, 2005, **109**, 9856-9859; (d) L.E. Roy, G. Scalmani, R. Kobayashi and E.R. Batista, *Dalton Trans.*, 2009, 6719-6721.
- S11. ADF2019.303 SCM, Theoretical Chemistry, Vrije Universiteit, Amsterdam, The Netherlands,

<http://www.scm.com>
